## L-WNK1 is required for BK channel activation in intercalated cells

Evan C. Ray<sup>1\*</sup>, Rolando Carrisoza-Gaytan<sup>2\*</sup>, Mohammad Al-Bataineh<sup>1</sup>, Allison L. Marciszyn<sup>1</sup>, Lubika J. Nkashama<sup>1</sup>, Jingxin Chen<sup>1</sup>, Aaliyah Winfrey<sup>1</sup>, Daniel Flores<sup>2</sup>, Peng Wu<sup>3</sup>, WenHui Wang<sup>3</sup>, Chou-Long Huang<sup>4</sup>, Arohan R. Subramanya<sup>1,5</sup>, Thomas R. Kleyman<sup>1,5,6</sup>, Lisa M. Satlin<sup>2</sup>

Departments of <sup>1</sup>Medicine, <sup>5</sup>Cell Biology, and <sup>6</sup>Pharmacology and Chemical Biology, University of Pittsburgh, Pittsburgh, PA; <sup>2</sup>Department of Pediatrics, Icahn School of Medicine at Mount Sinai, New York, NY; <sup>3</sup>Department of Pharmacology, New York Medical College, Valhalla, NY; and <sup>4</sup>Department of Internal Medicine, University of Iowa Carver College of Medicine, Iowa City, IA. \*Authors contributed equally to this work.

Running Title: L-WNK1 and intercalated cell BK channels

Keywords: BK channel, WNK1 kinase, potassium secretion, intercalated cells

Address all correspondence to:

Thomas Kleyman, MD  
Renal-Electrolyte Division  
University of Pittsburgh  
A919 Scaife Hall,  
3550 Terrace Street  
Pittsburgh, PA 15261  
Email: kleyman@pitt.edu

## Abstract

BK channels expressed in intercalated cells (ICs) in the aldosterone-sensitive distal nephron (ASDN) mediate flow-induced  $K^+$  secretion. In the ASDN of mice and rabbits, IC BK channel expression and activity increase with a high  $K^+$  diet. In cell culture, the long isoform of the kinase WNK1 (L-WNK1) increases BK channel expression and activity. Apical L-WNK1 expression is selectively enhanced in ICs in the ASDN of rabbits on a high  $K^+$  diet, suggesting that L-WNK1 contributes to BK channel regulation by dietary  $K^+$ . We examined the role of IC L-WNK1 expression in enhancing BK channel activity in response to a high  $K^+$  diet. Mice with an IC-selective deletion of L-WNK1 (IC-L-WNK1-KO) and littermate control mice were placed on a high  $K^+$  (5%  $K^+$  as KCl) diet for at least 10 days. IC-L-WNK1-KO mice exhibited higher blood  $K^+$  concentrations ( $[K^+]$ ) than controls. BK channel-dependent whole-cell currents in ICs from cortical collecting ducts of high  $K^+$  fed IC-L-WNK1-KO mice were reduced compared to controls. Six-hour urinary  $K^+$  excretion in response to a saline load was similar in IC-L-WNK1-KO mice and controls. The observations that IC-L-WNK1-KO mice have higher blood  $[K^+]$  and reduced IC BK channel currents are consistent with impaired urinary  $K^+$  secretion, and suggest that IC L-WNK1 has a role in the renal adaptation to a high  $K^+$  diet.

A moderate daily consumption of  $K^+$  in humans ( $\sim 100$  mmoles) exceeds the total extracellular  $K^+$  content of an adult ( $\sim 70$  mmoles) (16). Life-threatening hyperkalemia would certainly occur if not for the initial rapid intracellular buffering of excess  $K^+$  that enters the extracellular space, and the eventual urinary excretion of  $K^+$ . In the context of a high  $K^+$  diet, the aldosterone-sensitive distal nephron (ASDN) is a key site of secretion of  $K^+$  into the tubular lumen, leading to net urinary  $K^+$  excretion. High flow rates of tubular fluid further enhance  $K^+$  secretion in the ASDN, increasing urinary  $K^+$  excretion (11, 22, 26, 30, 33, 52).

An iberiotoxin-sensitive, large conductance,  $Ca^{2+}$ - and/or stretch-activated  $K^+$  channel, referred to as BK or  $K_{Ca1.1}$ , has a critical role in flow-induced  $K^+$  secretion (FIKS) in the ASDN (6, 7, 33, 46, 52). A high  $K^+$  environment (in salamanders) or high  $K^+$  diet (in rabbits and mice) stimulated apical expression of this channel as well as BK channel-mediated  $K^+$  secretion in the collecting duct (CD) (2, 7, 9, 33, 46, 52). A global knock-out of the mouse BK  $\alpha$  or  $\beta 1$  subunit provided support for the role of BK channels in renal  $K^+$  secretion (39, 40).

ENaC dependent  $Na^+$  absorption in the ASDN has an important role in  $K^+$  secretion and FIKS (25, 35), although ENaC independent  $K^+$  secretion has been observed (14). BK channels are expressed in both principal cells (PCs) and ICs (7, 9, 13, 33, 36). The question of whether BK channels in PCs, ICs or both cell types are responsible for FIKS has been addressed by several groups. There is a growing body of evidence supporting a key role of IC BK channels in FIKS. BK $\alpha$  expression in PCs is concentrated within the cells' single apical cilium (9). Chemical deciliation of PCs did not impair FIKS in isolated, perfused cortical collecting ducts (CCDs), suggesting that PCs do not have a central role in FIKS. Transition of rabbits to a high  $K^+$  diet increases BK $\alpha$  subunit expression primarily in ICs, rather than PCs (9). In mice, an IC-selective knockout of the BK $\alpha$  subunit abolished FIKS in isolated, perfused CCDs from these animals and was associated with an increased blood  $[K^+]$ , at least in male mice on a high  $K^+$  diet (7).

Mechanisms by which increases in dietary  $K^+$  enhance IC BK $\alpha$  expression and BK channel activity remain unclear. Previous studies suggest members of the WNK (with-no-lysine) kinase family are intermediaries in this process. WNK4 inhibited protein and functional expression of the BK $\alpha$  subunit in HEK293 cells (48, 55, 56). In contrast, both the long form of WNK1 (L-WNK1) and a truncated, kidney specific isoform of WNK1 (KS-WNK1) augmented expression of the BK $\alpha$  subunit in cultured cells (HEK293) (28, 50). Furthermore, rabbits fed a high  $K^+$  diet exhibited enhanced apical expression of L-WNK1 selectively in ICs (50). As L-WNK1 inhibits ROMK (12, 23), a key channel mediating  $K^+$  secretion in PCs, an IC selective increase in the expression of L-WNK1 has been proposed to have an important role in the renal response to a high  $K^+$  diet (50). These observations led us to examine the role of L-WNK1 in ICs in the renal adaptive response to a high  $K^+$  diet. A mouse model with an IC-specific disruption of L-WNK1 (IC-L-WNK1-KO) was generated and characterized. We found that gene disruption of L-WNK-1 in ICs blunted charybdotoxin (ChTX)-sensitive whole cell  $K^+$  currents in ICs in isolated CCDs from mice on a high  $K^+$  diet. When placed on a high  $K^+$  diet, IC-L-WNK1-KO mice had higher blood  $[K^+]$  than littermate controls, suggesting impaired IC-dependent  $K^+$  excretion.

## Methods

### *Animals:*

Mice were allowed free access to tap water and standard mouse chow (Prolab 5P76 Isopro RMH 3000), which was mixed with water for the IC-L-WNK1-KO mice (see below). All animal breeding, housing, and protocols were approved by the Institutional Animal Care and Use Committees at

the University of Pittsburgh, the Icahn School of Medicine at Mount Sinai, and New York Medical College. Mouse facilities were accredited by the American Association for the Accreditation of Laboratory Animal Care. Animals were euthanized in accordance with the National Institutes of Health Guidelines for the Care and Use of Laboratory Animals.

#### *Generation of IC-specific L-WNK1-KO mice:*

Mice with loxP sites flanking exon 2 of *Wnk1* (*L-Wnk1<sup>fl/fl</sup>*) in a C57Bl/6 background (53) (Figure 1), and mice expressing the Cre recombinase under control of the promoter for *Atp6v1b1*, encoding the vacuolar ATPase B1 subunit (B1:Cre mice; C57Bl/6 background) (31), were previously characterized. Deletion of exon 2 leaves KS-WNK1 intact, while ablating L-WNK1 expression in cells expressing the Cre recombinase. To confirm cell-specific Cre expression, mice hemizygous for B1:Cre were crossed with *Rosa26<sup>tdTomato</sup>* Cre reporter mice (7). Kidney cortex cryosections were labeled with a polyclonal goat anti-aquaporin-2 (Aqp2) antibody (0.2 µg/ml, sc-9882; Santa Cruz Biotechnology, Santa Cruz CA, USA), and detected using a donkey anti-goat immunoglobulin G conjugated to Cyanine Cy3 (0.5 µg/ml, Jackson ImmunoResearch Laboratories, West Grove, PA, USA). Images were acquired with a Leica TCS SP5 confocal microscope. The *Atp6v1b1* promoter selectively drives expression of Cre in Aqp2-negative tubular cells. Occasional staining in Aqp2-positive tubular cells was seen, as previously reported (32) (Figure 2).

To generate IC-L-WNK1-KO mice, male homozygous floxed L-WNK1 mice were bred with female B1:Cre-expressing mice. Genotyping was performed prior to weaning by PCR amplification, using the primer scheme shown in Figure 1 (primer details in (53)). Female offspring hemizygous for B1:Cre and heterozygous for floxed L-WNK1 were bred with male homozygous floxed L-WNK1 mice to obtain mice homozygous for floxed L-WNK1 and hemizygous for B1:Cre (IC-L-WNK1-KO). Sex-matched littermates that were homozygous for floxed L-WNK1, but without Cre, were used as controls, and mice of both sexes were used for all studies. After weaning, IC-L-WNK1-KO mice failed to thrive on solid food. When these mice were provided chow mixed with water, IC-L-WNK1-KO mice had weights similar to controls, as described in *Results*.

*Blood and Urine Metabolite Measurements:* Ten to 13 week-old mice were placed on a control K<sup>+</sup> gel diet (1% K<sup>+</sup>, TD.88238, Envigo) for a minimum of 2 days, and then switched to a high K<sup>+</sup> gel diet (5.2% K<sup>+</sup> as KCl, TD.09075, Envigo) for up to 11 to 13 d. To generate the gel diet, 3 gm agar was dissolved in 250 ml boiling H<sub>2</sub>O. The solution was cooled, 125 gm of powdered control (1% or 5.2% K<sup>+</sup>, TD.88238, Envigo) diet was incorporated, and the slurry was aliquoted into dishes to cool and harden before being placed in cages. After 10 d on the high K<sup>+</sup> diet, some mice were sacrificed to obtain blood to measure electrolytes. Other mice were placed in a metabolic cage for approximately 1 hr and encouraged to void, and then given 10% vol/wt sterile 0.9% saline via intraperitoneal injection. Mice were replaced in the metabolic cage, and urine was collected over 6 hours. Urine Na<sup>+</sup> and K<sup>+</sup> excretion were measured via flame photometry (IL 943, Instrumentation Laboratory, Bedford, MA). The following day, mice were sacrificed under 2-5% isoflurane anesthesia. Thoracotomy was performed, exposing the heart. Blood was aspirated from the cardiac ventricles using a heparinized syringe. An i-STAT handheld analyzer was used to measure electrolytes in whole blood (Abbot Point-of-Care, Princeton, NJ, USA). Plasma aldosterone levels were measured using an aldosterone ELISA kit (Enzo Life Sciences, Farmingdale, NY, USA).

*Immunofluorescence Microscopy:* One kidney from each mouse was sliced lengthwise and placed in 4% paraformaldehyde in PBS for 16 h at 4°C. After immersion in 30% sucrose in PBS with 0.02% azide, 5 µm-thick sections were prepared as described previously (4). Immunofluorescence labeling was performed with a rabbit antibody raised against amino acids

2031-2117 of the human L-WNK1 carboxyl-terminus (3 µg/ml, Atlas, HPA059157, Bromma, Sweden) (5), followed by a secondary donkey anti-rabbit Ig antibody coupled to Alexa 488 (3 µg/ml, Jackson ImmunoResearch Laboratories, West Grove, PA). A goat anti-Aqp2 antibody (0.2 µg/ml, as described above) and a secondary donkey anti-goat Ig antibody with conjugated Cy3 (0.5 µg/ml, Jackson ImmunoResearch Laboratories, West Grove, PA) identified PCs. TO-PRO-3 Cy5 was obtained from Molecular Probes (ThermoFisher, Grand Island, NY). Immunolabeled tissues were mounted in mounting medium (Vector Laboratories, Burlingame, CA), and imaged with a confocal laser scanning microscope (Leica TCS SP5, Model upright DM 6000S, Leica Microsystems Inc., Buffalo Grove, IL, USA) using a 63x objective with identical laser settings for all samples.

*Patch-clamp electrophysiology:* BK channel activity was assessed via perforated whole-cell recording of ICs in micro-dissected, split open CCDs from IC-L-WNK1-KO and littermate control mice on a high K<sup>+</sup> diet for 10 days, as previously described (7). The bath solution contained (in mM) 130 K<sup>+</sup> gluconate, 10 KCl, 0.5 MgCl<sub>2</sub>, 1.5 CaCl<sub>2</sub>, 10 HEPES, pH 7.4, whereas the pipette solution had 130 K<sup>+</sup> gluconate, 10 KCl, 1 MgCl<sub>2</sub>, 8.72 CaCl<sub>2</sub>, 10 EGTA (1 µM free Ca<sup>2+</sup>), 5 HEPES, pH 7.4. After forming a high-resistance seal (>2 GΩ), the membrane capacitance was monitored until the whole-cell patch configuration was formed. The IC membrane capacitance ranged between 12.5 to 13.5 pF; currents were normalized to a membrane capacitance of 13 pF per cell. Cells were clamped at +60 mV and outward BK currents were identified by adding 100 nM charybdotoxin (ChTx) to the bath solution. Currents, recorded using an Axon 200A patch-clamp amplifier, were low-pass filtered at 1 KHz, and digitized by an Axon interface (Digidata 1440A, Molecular Devices) (27, 55). Data were analyzed using the pCLAMP Software System 9 (Molecular Devices).

*Data analysis:* Data were analyzed in Graphpad Prism v. 8.0.2. Removal of outliers was performed using the ROUT method with a ROUT coefficient of 1%. Reported errors and error bars shown all represent standard deviations. Experimental and control data sets were analyzed via two-tailed Student's t-test. A p value of less than 0.05 was considered statistically significant.

## Results

### *IC-specific L-WNK1 knock out (IC-L-WNK1-KO) mice*

To clearly define the role of L-WNK1 in enhancing IC-dependent BK expression and facilitating the adaptation to a high K<sup>+</sup> diet, we generated both mice where L-WNK1 was selectively deleted from ICs (IC-L-WNK1-KO) and littermate controls. Expression of the Cre recombinase in Aqp2-negative tubular epithelial cells was confirmed by crossing B1:Cre mice with Ai9 tdTomato-expressing Cre-reporter mice (29). Tubules from these mice demonstrated robust expression of tdTomato in Aqp2-negative cells within Aqp2-expressing tubules (Figure 2). A minor fraction of Aqp2-expressing cells also expressed tdTomato, consistent with previous work suggesting that B1 promoter-driven Cre expression was occasionally seen in PCs (31).

Genotyping was performed as previously described (53) and recombination between L-WNK1 loxP sites flanking exon 2 was confirmed by PCR (Figure 1). A recombinant band was observed in kidney, but not tail or heart of IC-L-WNK1-KO mice. IC-L-WNK1-KO mice were born at a frequency of approximately 20% lower than expected, gained weight when chow was mixed with water (see *Methods*), developed normally, and had no gross morphologic abnormalities. We examined WNK1 expression in kidney sections from IC-L-WNK1-KO and littermate control mice maintained on a high K<sup>+</sup> diet for at least 10 days, using an antibody directed against the C-terminus of WNK1 (which recognizes both L-WNK1 and KS-WNK1). We did not observe

differences in WNK1 expression in Aqp2-negative cells within Aqp2-expressing tubules obtained from IC-L-WNK1-KO and littermate control mice (not shown). The lack of difference in WNK1 expression in ICs from IC-L-WNK1-KO and littermate control mice may reflect expression of KS-WNK1 in ICs.

#### *IC-L-WNK1-KO mice exhibited an elevated blood $[K^+]$ on a high $K^+$ diet*

IC-L-WNK1-KO mice developed normally and resembled control mice in terms of body weight (Figure 3 and Table 1). At 10-13 weeks of age mice transitioned to a high  $K^+$  diet. Whole blood electrolytes were assessed after 10-13 days on the high  $K^+$  diet. Blood  $K^+$  was significantly higher in the IC-L-WNK1-KO mice ( $5.4 \pm 1.0$  mM,  $n=26$ ), compared to littermate controls ( $4.8 \pm 0.6$  mM,  $n=19$ ,  $p<0.05$ , Figure 3 and Table 1). When analyzed by sex, significant differences in blood  $[K^+]$  were not observed (not shown). Similar levels of blood  $Na^+$ ,  $Cl^-$ , total  $CO_2$ ,  $Ca^{2+}$ , urea nitrogen, and hemoglobin were observed in IC-L-WNK1-KO mice and littermate controls. Furthermore, plasma aldosterone levels did not differ between IC-L-WNK1-KO mice and controls (Table 1).

#### *IC BK channel currents are reduced in IC-L-WNK1-KO mice*

We next examined whether BK channel activity in ICs was reduced in IC-L-WNK1-KO mice, when compared to littermate controls. Perforated whole cell patch clamp recordings of  $K^+$  currents were performed on ICs clamped at +60 mV in isolated tubules from IC-L-WNK1-KO and littermate control mice on a high  $K^+$  diet for 10 or more days. Currents were normalized to a membrane capacitance of 13 pF per cell. Charybdotoxin-sensitive currents, reflecting BK channel-mediated currents (8), were significantly reduced in ICs from IC-L-WNK1-KO mice ( $452 \pm 73$  pA,  $n=8$ ) compared to littermate controls ( $691 \pm 91$  pA,  $n=8$ ,  $p<0.001$ , two-tailed Student's t-test, Figure 4).

#### *Urinary $Na^+$ and $K^+$ excretion*

As BK channels in ICs mediate FIKS, we examined whether high  $K^+$  fed IC-L-WNK1-KO mice exhibited diminished urinary  $K^+$  excretion (UKV) in the context of an intraperitoneal-administered bolus of normal saline (10% of body weight), when compared to littermate controls. Urine was collected over a 6 h period, and UKV and UNaV were determined. IC-L-WNK1-KO and littermate control mice exhibited similar UKV (controls:  $26.5 \pm 11.6$   $\mu$ mol/hr,  $n = 15$ ; IC-L-WNK1-KO:  $28.1 \pm 9.2$   $\mu$ mol/hr,  $n = 19$ ,  $p =$  not significant) and similar UNaV (controls:  $29.6 \pm 8.2$   $\mu$ mol/hr,  $n = 15$ ; IC-L-WNK1-KO:  $32.2 \pm 9.7$   $\mu$ mol/hr,  $n = 19$ ,  $p =$  not significant; Figure 5 and Table 1).

## Discussion

The WNK family of protein kinases has a key role in coordinating the regulated absorption of  $Na^+$  and secretion of  $K^+$  in the ASDN (17, 20). In the distal convoluted tubule (DCT), both L-WNK1 and WNK4 activate a signaling cascade involving Sterile20-related proline-alanine-rich kinase and oxidative stress responsive kinase-1 (SPAK and OSR1) to eventually activate the thiazide-sensitive Na-Cl cotransporter (NCC), enhancing  $Na^+$  and  $Cl^-$  absorption (17, 20). In more distal aspects of the nephron, WNK4 has been shown to inhibit ENaC (41, 42, 54), whereas KS-WNK1 activates ENaC (18, 34). Interestingly, both WNK4 and L-WNK1 activate SGK1 (19), a well characterized activator of ENaC (3). Furthermore, SPAK has been shown to activate ENaC (1). Most of this work has been performed in heterologous expression systems. Studies of mouse models where specific WNKs have been genetically deleted in PCs are needed to clarify how specific WNKs modulate ENaC *in vivo*.

WNKs have differing roles in regulating  $K^+$  secretory channels. ROMK is inhibited by L-WNK1 and WNK4 (12, 21, 23, 24, 42). In heterologous expression systems, WNK4 inhibits BK channels (48, 55, 56). In contrast, both L-WNK1 and KS-WNK1 increase both surface and functional expression



of BK channels, and its kinase activity is not required for BK channel activation (28, 50). Previous work has suggested that L-WNK1 activates BK channels by inhibiting ERK1/2-dependent channel degradation (28).

BK channels are responsible for FIKS (6, 7, 33, 46, 52). While BK channels are expressed in both PCs and ICs, our recent work suggests that BK channels in ICs mediate FIKS (7). Our current work suggests L-WNK1 has a role in activating BK channels in ICs in mice fed a high KCl diet. Specifically, whole IC BK currents, as measured by the charybdotoxin-sensitive component of the  $K^+$  current, were significantly reduced in IC-L-WNK1-KO mice fed a high KCl diet, compared to littermate controls. Consistent with reduced BK channel activity, IC-L-WNK1-KO mice on a high KCl diet had significantly higher blood  $[K^+]$  compared to littermate controls. We did not observe a sex difference regarding blood  $[K^+]$ , as we observed with IC-BK  $\alpha$  subunit knockout mice where males selectively exhibited an increased blood  $[K^+]$  on a high  $K^+$  diet (7). Interestingly, the magnitude of kaliuresis observed in response to volume expansion was similar in IC-L-WNK1-KO and control mice, suggesting compensatory mechanisms in the IC-L-WNK1-KO mice were present to maintain kaliuresis. These mechanisms remain to be determined.

We previously found that L-WNK1 expression is selectively enhanced in ICs in response to a high  $K^+$  diet (50). Why this occurs is still unclear. However, our data suggest that an IC specific increase of L-WNK1 expression should enhance BK channel activity, as BK channel activity was reduced in ICs from IC-L-WNK1-KO mice (Fig 5). There are a number of cellular factors that could influence L-WNK1 expression and activity in response to an increase in dietary  $K^+$ . For example, L-WNK variants express PY motifs that are binding sites for the ubiquitin ligase Nedd4-2, targeting L-WNK1 for ubiquitination and degradation (43). Aldosterone-dependent activation of the SGK1 in ICs could prevent Nedd4-2-dependent L-WNK1 degradation. WNKs are inhibited by increases in intracellular  $[Cl^-]$  (10, 38), although it is not known whether a high  $K^+$  diet is associated with a change in intracellular  $[Cl^-]$  in ICs that could affect L-WNK1 activity. It is interesting that aldosterone binding and subsequent signaling in ICs is dependent on dephosphorylation of Ser483 on the mineralocorticoid receptor, and hyperkalemia enhances Ser483 phosphorylation via unc-51-like kinase 1 (ULK1) (44, 45). Previous work suggests that WNK1 reduces expression of ULK1 (15), raising the possibility of a positive feedback loop. IC MR knockout mice exhibit hyperkalemia (37), proposed to be due to reduced ENaC activity, in turn reducing the driving force for  $K^+$  secretion. It could also reflect dampened BK channel-mediated  $K^+$  excretion, as administration of the MR antagonist spironolactone to rats reduced BK  $\alpha$  subunit abundance (51).

BK channel mediated currents were moderately reduced in ICs from IC-L-WNK1-KO mice, as compared to the virtual absence of BK channel mediated currents in ICs from mice with a genetic deletion of BK  $\alpha$  subunits in ICs (7). These observations are consistent with studies that have identified cellular mechanisms and pathways, in addition to L-WNK1, by which a high  $K^+$  diet activates BK channel expression and activity. For example, a high  $K^+$  diet stimulates the expression of CYP2C23 and increases the 11,12-epoxyeicosatrienoic acid concentrations in the CCD, which activates BK channels and FIKS (47). A high  $K^+$  diet increases expression and activity of HO-1, and CO generated by HO-1 activates BK channels in the CCD by nitric oxide synthase- and protein kinase G-independent mechanisms (49).

In summary, our results demonstrate that L-WNK1 has a role in BK channel activation in ICs in response to a high  $K^+$  diet. Furthermore, the increased blood  $[K^+]$  in IC-L-WNK1-KO suggests that this signaling pathway has an important role in the adaptation to a high  $K^+$  diet.

## Acknowledgments

This work was supported by grants from the National Institutes of Health, including DK038470 (TRK and LMS), DK110332 (ECR), DK109038 (MAB), DK054983 (WHW), DK111542 (CLH), DK098145 and DK119252 (ARS), and P30 DK079307 (TRK, ARS and LMS). We thank Drs. Donald Kohan and Raoul Nelson at the University of Utah for the B1:Cre mice.

## REFERENCES

1. **Ahmed M, Salker MS, Elvira B, Umbach AT, Fakhri H, Saeed AM, Shumilina E, Hosseinzadeh Z, and Lang F.** SPAK Sensitive Regulation of the Epithelial Na Channel ENaC. *Kidney Blood Press Res* 40: 335-343, 2015.
2. **Bailey MA, Cantone A, Yan Q, MacGregor GG, Leng Q, Amorim JB, Wang T, Hebert SC, Giebisch G, and Malnic G.** Maxi-K channels contribute to urinary potassium excretion in the ROMK-deficient mouse model of Type II Bartter's syndrome and in adaptation to a high-K diet. *Kidney Int* 70: 51-59, 2006.
3. **Bhalla V, Soundararajan R, Pao AC, Li H, and Pearce D.** Disinhibitory pathways for control of sodium transport: regulation of ENaC by SGK1 and GILZ. *American journal of physiology Renal physiology* 291: F714-F721, 2006.
4. **Bouley R, Pastor-Soler N, Cohen O, McLaughlin M, Breton S, and Brown D.** Stimulation of AQP2 membrane insertion in renal epithelial cells in vitro and in vivo by the cGMP phosphodiesterase inhibitor sildenafil citrate (Viagra). *American journal of physiology Renal physiology* 288: F1103-F1112, 2005.
5. **Boyd-Shiwerski CR, Shiwerski DJ, Roy A, Namboodiri HN, Nkashama LJ, Xie J, McClain KL, Marciszyn A, Kleyman TR, Tan RJ, Stolz DB, Puthenveedu MA, Huang CL, and Subramanya AR.** Potassium-regulated distal tubule WNK bodies are kidney-specific WNK1 dependent. *Molecular biology of the cell* 29: 499-509, 2018.
6. **Carrisoza-Gaytan R, Carattino MD, Kleyman TR, and Satlin LM.** An unexpected journey: conceptual evolution of mechanoregulated potassium transport in the distal nephron. *Am J Physiol Cell Physiol* 310: C243-C259, 2016.
7. **Carrisoza-Gaytan R, Ray EC, Flores D, Marciszyn AL, Wu P, Liu L, Subramanya AR, Wang W, Sheng S, Nkashama LJ, Chen J, Jackson EK, Mutchler SM, Heja S, Kohan DE, Satlin LM, and Kleyman TR.** Intercalated cell BK $\alpha$  subunit is required for flow-induced K<sup>+</sup> secretion. *JCI Insight* 5: 2020.
8. **Carrisoza-Gaytan R, Ray EC, Flores D, Marciszyn AL, Wu P, Liu L, Subramanya AR, Wang W, Sheng S, Nkashama LJ, Chen J, Jackson EK, Mutchler SM, Heja S, Kohan DE, Satlin LM, and Kleyman TR.** Intercalated cell BK $\alpha$  subunit is required for flow-induced K<sup>+</sup> secretion. *JCI insight* 5: 2020.
9. **Carrisoza-Gaytan R, Wang L, Schreck C, Kleyman TR, Wang WH, and Satlin LM.** The mechanosensitive BK $\alpha$ /beta1 channel localizes to cilia of principal cells in rabbit cortical collecting duct (CCD). *American journal of physiology Renal physiology* 312: F143-F156, 2017.
10. **Chen JC, Lo YF, Lin YW, Lin SH, Huang CL, and Cheng CJ.** WNK4 kinase is a physiological intracellular chloride sensor. *Proc Natl Acad Sci U S A* 116: 4502-4507, 2019.
11. **Engbretson BG, and Stoner LC.** Flow-dependent potassium secretion by rabbit cortical collecting tubule in vitro. *The American journal of physiology* 253: F896-903, 1987.



12. **Fang L, Garuti R, Kim BY, Wade JB, and Welling PA.** The ARH adaptor protein regulates endocytosis of the ROMK potassium secretory channel in mouse kidney. *The Journal of clinical investigation* 119: 3278-3289, 2009.
13. **Frindt G, and Palmer LG.** Apical potassium channels in the rat connecting tubule. *American journal of physiology Renal physiology* 287: F1030-1037, 2004.
14. **Frindt G, and Palmer LG.** K<sup>+</sup> secretion in the rat kidney: Na<sup>+</sup> channel-dependent and - independent mechanisms. *American journal of physiology Renal physiology* 297: F389-396, 2009.
15. **Gallolu Kankanamalage S, Lee AY, Wichaidit C, Lorente-Rodriguez A, Shah AM, Stippec S, Whitehurst AW, and Cobb MH.** Multistep regulation of autophagy by WNK1. *Proc Natl Acad Sci U S A* 113: 14342-14347, 2016.
16. **Giebisch G.** Renal potassium transport: mechanisms and regulation. *The American journal of physiology* 274: F817-833, 1998.
17. **Hadchouel J, Ellison DH, and Gamba G.** Regulation of Renal Electrolyte Transport by WNK and SPAK-OSR1 Kinases. *Annu Rev Physiol* 78: 367-389, 2016.
18. **Hadchouel J, Soukaseum C, Busst C, Zhou XO, Baudrie V, Zurrer T, Cambillau M, Elghozi JL, Lifton RP, Loffing J, and Jeunemaitre X.** Decreased ENaC expression compensates the increased NCC activity following inactivation of the kidney-specific isoform of WNK1 and prevents hypertension. *Proc Natl Acad Sci U S A* 107: 18109-18114, 2010.
19. **Heise CJ, Xu BE, Deaton SL, Cha SK, Cheng CJ, Earnest S, Sengupta S, Juang YC, Stippec S, Xu Y, Zhao Y, Huang CL, and Cobb MH.** Serum and glucocorticoid-induced kinase (SGK) 1 and the epithelial sodium channel are regulated by multiple with no lysine (WNK) family members. *J Biol Chem* 285: 25161-25167, 2010.
20. **Hoorn EJ, Gritter M, Cuevas CA, and Fenton RA.** Regulation of the Renal NaCl Cotransporter and Its Role in Potassium Homeostasis. *Physiol Rev* 100: 321-356, 2020.
21. **Kahle KT, Wilson FH, Leng Q, Lalioti MD, O'Connell AD, Dong K, Rapson AK, MacGregor GG, Giebisch G, Hebert SC, and Lifton RP.** WNK4 regulates the balance between renal NaCl reabsorption and K<sup>+</sup> secretion. *Nat Genet* 35: 372-376, 2003.
22. **Khuri RN, Strieder WN, and Giebisch G.** Effects of flow rate and potassium intake on distal tubular potassium transfer. *The American journal of physiology* 228: 1249-1261, 1975.
23. **Lazrak A, Liu Z, and Huang CL.** Antagonistic regulation of ROMK by long and kidney-specific WNK1 isoforms. *Proc Natl Acad Sci U S A* 103: 1615-1620, 2006.
24. **Lin DH, Yue P, Rinehart J, Sun P, Wang Z, Lifton R, and Wang WH.** Protein phosphatase 1 modulates the inhibitory effect of With-no-Lysine kinase 4 on ROMK channels. *American journal of physiology Renal physiology* 303: F110-119, 2012.
25. **Liu W, Morimoto T, Woda C, Kleyman TR, and Satlin LM.** Ca<sup>2+</sup> dependence of flow-stimulated K secretion in the mammalian cortical collecting duct. *American journal of physiology Renal physiology* 293: F227-235, 2007.
26. **Liu W, Schreck C, Coleman RA, Wade JB, Hernandez Y, Zavilowitz B, Warth R, Kleyman TR, and Satlin LM.** Role of NKCC in BK channel-mediated net K(+) secretion in the CCD. *American journal of physiology Renal physiology* 301: F1088-1097, 2011.
27. **Liu W, Wei Y, Sun P, Wang WH, Kleyman TR, and Satlin LM.** Mechanoregulation of BK channel activity in the mammalian cortical collecting duct: role of protein kinases A and C. *American journal of physiology Renal physiology* 297: F904-915, 2009.
28. **Liu Y, Song X, Shi Y, Shi Z, Niu W, Feng X, Gu D, Bao HF, Ma HP, Eaton DC, Zhuang J, and Cai H.** WNK1 activates large-conductance Ca<sup>2+</sup>-activated K<sup>+</sup> channels through modulation of ERK1/2 signaling. *J Am Soc Nephrol* 26: 844-854, 2015.
29. **Madisen L, Zwingman TA, Sunkin SM, Oh SW, Zariwala HA, Gu H, Ng LL, Palmiter RD, Hawrylycz MJ, Jones AR, Lein ES, and Zeng H.** A robust and high-throughput Cre reporting and characterization system for the whole mouse brain. *Nat Neurosci* 13: 133-140, 2010.

30. **Malnic G, Berliner RW, and Giebisch G.** Flow dependence of K<sup>+</sup> secretion in cortical distal tubules of the rat. *The American journal of physiology* 256: F932-941, 1989.
31. **Miller RL, Lucero OM, Riemondy KA, Baumgartner BK, Brown D, Breton S, and Nelson RD.** The V-ATPase B1-subunit promoter drives expression of Cre recombinase in intercalated cells of the kidney. *Kidney international* 75: 435-439, 2009.
32. **Miller RL, Lucero OM, Riemondy KA, Baumgartner BK, Brown D, Breton S, and Nelson RD.** The V-ATPase B1-subunit promoter drives expression of Cre recombinase in intercalated cells of the kidney. *Kidney international* 75: 435-439, 2009.
33. **Najjar F, Zhou H, Morimoto T, Bruns JB, Li HS, Liu W, Kleyman TR, and Satlin LM.** Dietary K<sup>+</sup> regulates apical membrane expression of maxi-K channels in rabbit cortical collecting duct. *American journal of physiology Renal physiology* 289: F922-932, 2005.
34. **Naray-Fejes-Toth A, Snyder PM, and Fejes-Toth G.** The kidney-specific WNK1 isoform is induced by aldosterone and stimulates epithelial sodium channel-mediated Na<sup>+</sup> transport. *Proc Natl Acad Sci U S A* 101: 17434-17439, 2004.
35. **O'Neil RG, and Boulpaep EL.** Effect of amiloride on the apical cell membrane cation channels of a sodium-absorbing, potassium-secreting renal epithelium. *The Journal of membrane biology* 50: 365-387, 1979.
36. **Palmer LG, and Frindt G.** High-conductance K channels in intercalated cells of the rat distal nephron. *American journal of physiology Renal physiology* 292: F966-973, 2007.
37. **Pham TD, Verlander JW, Wang Y, Romero CA, Yue Q, Chen C, Thumova M, Eaton DC, Lazo-Fernandez Y, and Wall SM.** Aldosterone Regulates Pendrin and Epithelial Sodium Channel Activity through Intercalated Cell Mineralocorticoid Receptor-Dependent and -Independent Mechanisms over a Wide Range in Serum Potassium. *J Am Soc Nephrol* 31: 483-499, 2020.
38. **Piala AT, Moon TM, Akella R, He H, Cobb MH, and Goldsmith EJ.** Chloride sensing by WNK1 involves inhibition of autophosphorylation. *Sci Signal* 7: ra41, 2014.
39. **Pluznick JL, Wei P, Carmines PK, and Sansom SC.** Renal fluid and electrolyte handling in BKCα-beta1<sup>-/-</sup> mice. *American journal of physiology Renal physiology* 284: F1274-1279, 2003.
40. **Rieg T, Vallon V, Sausbier M, Sausbier U, Kaissling B, Ruth P, and Osswald H.** The role of the BK channel in potassium homeostasis and flow-induced renal potassium excretion. *Kidney Int* 72: 566-573, 2007.
41. **Ring AM, Cheng SX, Leng Q, Kahle KT, Rinehart J, Lalioti MD, Volkman HM, Wilson FH, Hebert SC, and Lifton RP.** WNK4 regulates activity of the epithelial Na<sup>+</sup> channel in vitro and in vivo. *Proc Natl Acad Sci U S A* 104: 4020-4024, 2007.
42. **Ring AM, Leng Q, Rinehart J, Wilson FH, Kahle KT, Hebert SC, and Lifton RP.** An SGK1 site in WNK4 regulates Na<sup>+</sup> channel and K<sup>+</sup> channel activity and has implications for aldosterone signaling and K<sup>+</sup> homeostasis. *Proc Natl Acad Sci U S A* 104: 4025-4029, 2007.
43. **Roy A, Al-Qusairi L, Donnelly BF, Ronzaud C, Marciszyn AL, Gong F, Chang YP, Butterworth MB, Pastor-Soler NM, Hallows KR, Staub O, and Subramanya AR.** Alternatively spliced proline-rich cassettes link WNK1 to aldosterone action. *The Journal of clinical investigation* 125: 3433-3448, 2015.
44. **Shibata S, Ishizawa K, Wang Q, Xu N, Fujita T, Uchida S, and Lifton RP.** ULK1 Phosphorylates and Regulates Mineralocorticoid Receptor. *Cell Rep* 24: 569-576, 2018.
45. **Shibata S, Rinehart J, Zhang J, Moeckel G, Castaneda-Bueno M, Stiegler AL, Boggan TJ, Gamba G, and Lifton RP.** Mineralocorticoid receptor phosphorylation regulates ligand binding and renal response to volume depletion and hyperkalemia. *Cell Metab* 18: 660-671, 2013.
46. **Stoner LC, and Viggiano SC.** Environmental KCl causes an upregulation of apical membrane maxi K and ENaC channels in everted Ambystoma collecting tubule. *J Membr Biol* 162: 107-116, 1998.

47. **Sun P, Liu W, Lin DH, Yue P, Kemp R, Satlin LM, and Wang WH.** Epoxyeicosatrienoic acid activates BK channels in the cortical collecting duct. *J Am Soc Nephrol* 20: 513-523, 2009.
48. **Wang Z, Subramanya AR, Satlin LM, Pastor-Soler NM, Carattino MD, and Kleyman TR.** Regulation of large-conductance  $\text{Ca}^{2+}$ -activated  $\text{K}^{+}$  channels by WNK4 kinase. *Am J Physiol Cell Physiol* 305: C846-853, 2013.
49. **Wang Z, Yue P, Lin DH, and Wang WH.** Carbon monoxide stimulates  $\text{Ca}^{2+}$ -dependent big-conductance K channels in the cortical collecting duct. *American journal of physiology Renal physiology* 304: F543-552, 2013.
50. **Webb TN, Carrisoza-Gaytan R, Montalbetti N, Rued A, Roy A, Socovich AM, Subramanya AR, Satlin LM, Kleyman TR, and Carattino MD.** Cell-specific regulation of L-WNK1 by dietary K. *American journal of physiology Renal physiology* 310: F15-26, 2016.
51. **Wen D, Cornelius RJ, Yuan Y, and Sansom SC.** Regulation of BK- $\alpha$  expression in the distal nephron by aldosterone and urine pH. *American journal of physiology Renal physiology* 305: F463-476, 2013.
52. **Woda CB, Bragin A, Kleyman TR, and Satlin LM.** Flow-dependent  $\text{K}^{+}$  secretion in the cortical collecting duct is mediated by a maxi-K channel. *American journal of physiology Renal physiology* 280: F786-793, 2001.
53. **Xie J, Wu T, Xu K, Huang IK, Cleaver O, and Huang CL.** Endothelial-specific expression of WNK1 kinase is essential for angiogenesis and heart development in mice. *Am J Pathol* 175: 1315-1327, 2009.
54. **Yu L, Cai H, Yue Q, Alli AA, Wang D, Al-Khalili O, Bao HF, and Eaton DC.** WNK4 inhibition of ENaC is independent of Nedd4-2-mediated ENaC ubiquitination. *American journal of physiology Renal physiology* 305: F31-41, 2013.
55. **Yue P, Zhang C, Lin DH, Sun P, and Wang WH.** WNK4 inhibits  $\text{Ca}^{2+}$ -activated big-conductance potassium channels (BK) via mitogen-activated protein kinase-dependent pathway. *Biochimica et biophysica acta* 1833: 2101-2110, 2013.
56. **Zhuang J, Zhang X, Wang D, Li J, Zhou B, Shi Z, Gu D, Denson DD, Eaton DC, and Cai H.** WNK4 kinase inhibits Maxi K channel activity by a kinase-dependent mechanism. *American journal of physiology Renal physiology* 301: F410-419, 2011.

**Table 1**

|                                   | <b>L-WNK1<sup>fl/fl</sup><br/>Control</b> | <b>L-WNK1<sup>fl/fl</sup><br/>B1:Cre</b> | <b>p</b> |
|-----------------------------------|-------------------------------------------|------------------------------------------|----------|
| <b>Blood</b>                      |                                           |                                          |          |
| K <sup>+</sup> (mmol/L)           | 4.8 ± 0.6 (19)                            | 5.4 ± 1.0 (26)                           | 0.037    |
| Na <sup>+</sup> (mmol/L)          | 146 ± 2 (19)                              | 146 ± 2 (26)                             | NS       |
| Cl <sup>-</sup> (mmol/L)          | 115 ± 4 (19)                              | 116 ± 4 (26)                             | NS       |
| tCO <sub>2</sub> (mmol/L)         | 21.2 ± 2 (19)                             | 20.3 ± 3 (25)                            | NS       |
| Ionized Ca <sup>2+</sup> (mmol/L) | 1.26 ± 0.12 (19)                          | 1.26 ± 0.11 (26)                         | NS       |
| Urea Nitrogen (mg/dL)             | 20 ± 4 (19)                               | 22 ± 4 (26)                              | NS       |
| Hemoglobin (mg/dL)                | 12.7 ± 1.0 (19)                           | 12.4 ± 1.1 (26)                          | NS       |
| <b>Plasma</b>                     |                                           |                                          |          |
| Aldosterone                       | 1969 ± 2165 (16)                          | 1779 ± 1978 (16)                         | NS       |
| <b>Urine</b>                      |                                           |                                          |          |
| UNaV̇ (μmol/hr)                   | 29.6 ± 8.2 (19)                           | 32.2 ± 9.7 (15)                          | NS       |
| UKV̇ (μmol/hr)                    | 26.5 ± 11.6 (19)                          | 28.1 ± 9.2 (15)                          | NS       |
| <b>Mouse Weights</b>              |                                           |                                          |          |
| Females (gm)                      | 24.3 ± 3.4 (9)                            | 23.4 ± 1.8 (7)                           | NS       |
| Males (gm)                        | 29.3 ± 4.0 (11)                           | 29.3 ± 3.5 (15)                          | NS       |

Blood and urine measurements were obtained in IC-L-WNK1-KO and littermate control mice after 10 days on a high K<sup>+</sup> diet, as described under *Methods*. Differences were assessed using a two-tailed Student's t-test. NS=not significant.

# Figure Legends

**Figure 1.** Generation of L-WNK1-IC-KO mice. **A.** Primers used for genotyping and confirmation of L-WNK1 exon 2 excision (not to scale). Sequences are as previously reported (53). **B.** Primers cF2 and cR1 amplify the wild-type (non-floxed) WNK1 locus into a ~350 base pair PCR product. cF2 and cR2 generate a 180 base-pair product from the floxed allele. **C.** The cF1/cR1 primer pair amplified the excised allele in kidney but not in heart or tail.

**Figure 2.** The vacuolar ATPase B1 subunit promoter drives Cre expression predominantly in Aqp2-negative cells. Aqp2 expression is shown in green. tdTomato is shown in red. Nuclei are highlighted with TO-PRO-3 staining. Most Aqp2-negative cells express tdTomato. A minority of Aqp2-expressing cells also express tdTomato (arrowhead). Representative images of kidney sections from 2 mice.

**Figure 3.** L-WNK1-IC-KO mice on a high K<sup>+</sup> diet exhibited higher blood [K<sup>+</sup>] than littermate controls. Other electrolytes, hemoglobin (Hb), and blood urea nitrogen (BUN) did not differ. Weights were similar between L-WNK1-IC-KO mice and controls. Means ± SD are shown. \* p<0.05, IC-L-WNK1-KO vs. littermate controls, two-tailed Student's t-test.

**Figure 4.** Charybdotoxin-sensitive currents (indicative of BK channel activity) were reduced in intercalated cells (ICs) from L-WNK1-IC-KO mice on a high K<sup>+</sup> diet. Perforated whole-cell current tracings were collected from ICs in micro-dissected tubules from L-WNK1-IC-KO or littermate control mice on a high K<sup>+</sup> diet. Means ± SD are shown. \* p<0.05, IC-L-WNK1-KO vs. littermate controls, two-tailed Student's t-test.

**Figure 5.** Urinary K<sup>+</sup> and Na<sup>+</sup> excretion in response to a fluid bolus did not differ between L-WNK1-IC-KO and littermate control mice. Mice were placed on a high K<sup>+</sup> diet for at least 10 days and given a 10% body weight injection of 0.9% saline. Urine was collected in metabolic cages over 6 hours and used to calculate hourly excretion. Means ± SD are shown. p=not significant, IC-L-WNK1-KO vs. littermate controls, two-tailed Student's t-test.



**Figure 1.**

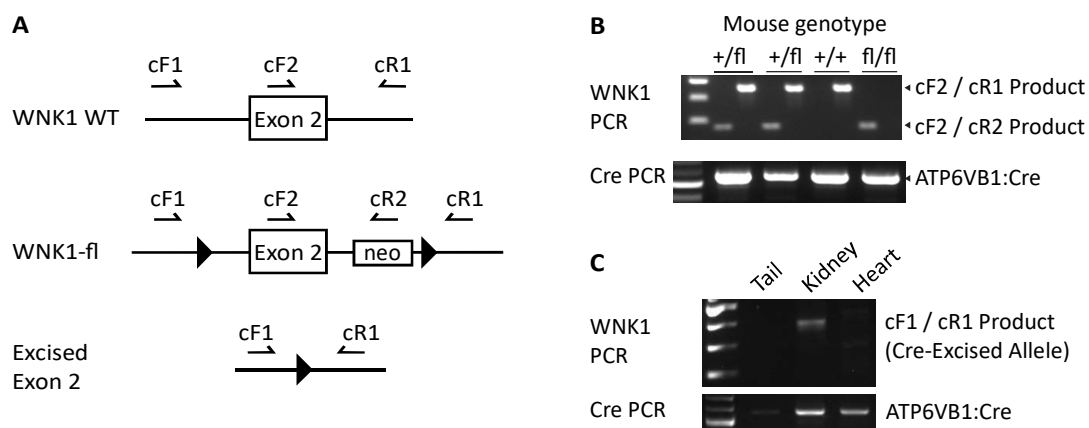

**Figure 2.**

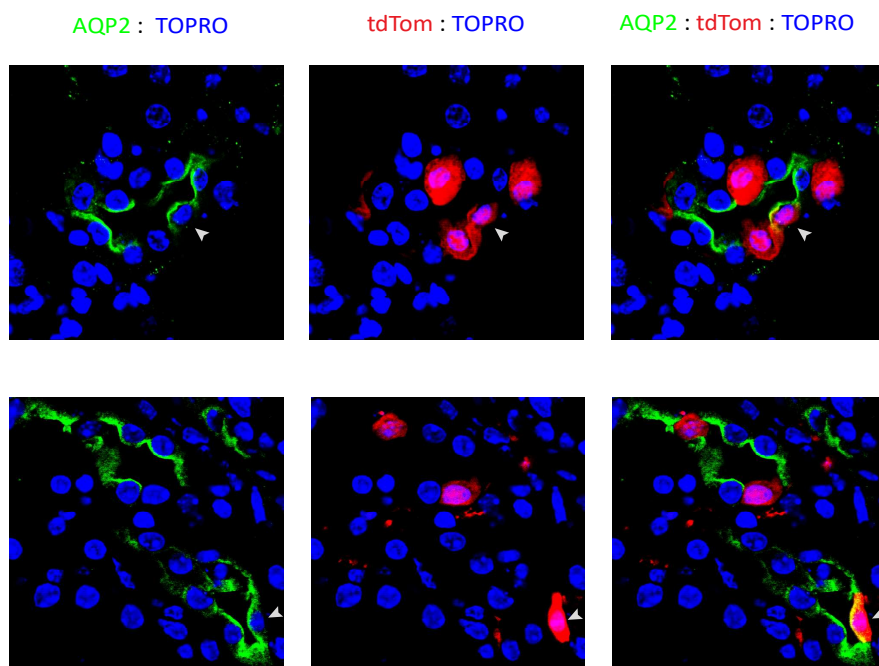

Figure 3.

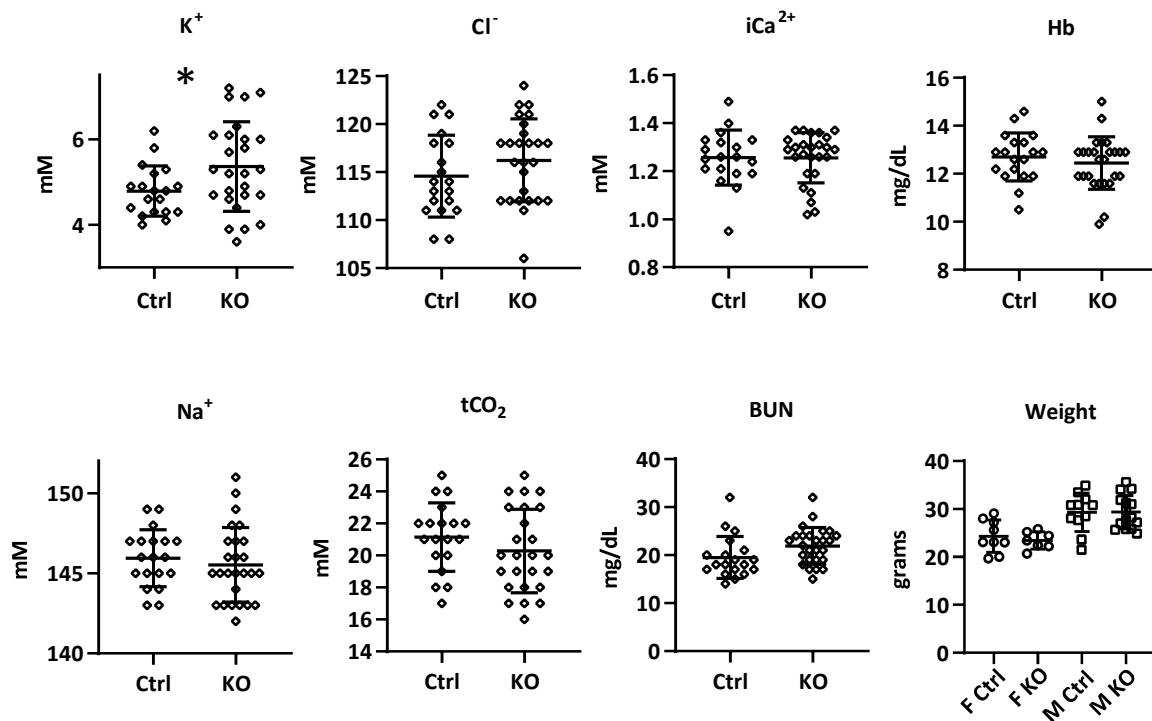

**Figure 4.**

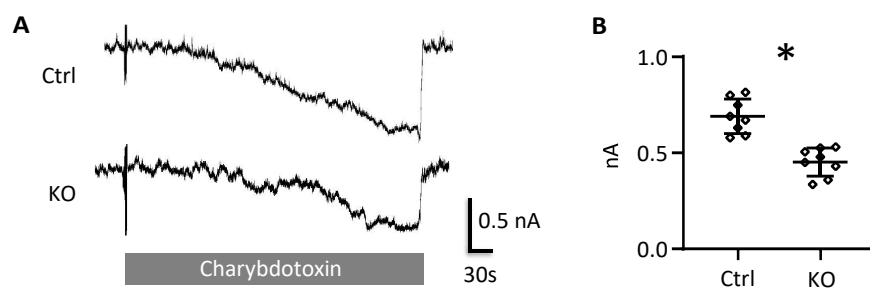

**Figure 5.**

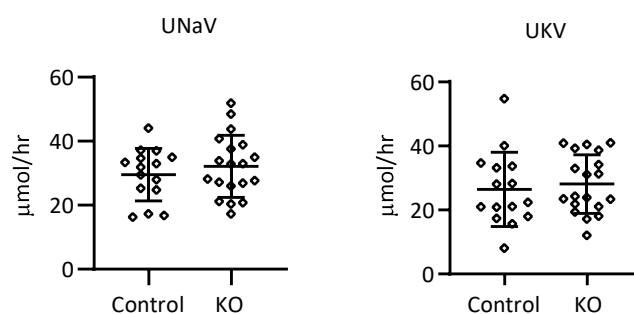

Source: http://biorxiv.org/content/10.1101/2021.01.26.428162v1.full.pdf
